# Supplementary material for: Daily intake of Lactobacillus alleviates autistic-like behaviors by ameliorating the 5-hydroxytryptamine metabolic disorder in VPA-treated rats during weaning and sexual maturation
Source: Royal Society of Chemistry journal article supplement (doi:10.1039/d0fo02375b), 2021-01-01
Supplement: d0fo02375b4.pdf [file d0fo02375b4.pdf]

| sample-id | absolute-filepath | direction |
|-----------|-------------------|-----------|
| control1  | 6_R1.fastq.gz     | forward   |
| control1  | 6_R2.fastq.gz     | reverse   |
| control2  | 7_R1.fastq.gz     | forward   |
| control2  | 7_R2.fastq.gz     | reverse   |
| control3  | 8_R1.fastq.gz     | forward   |
| control3  | 8_R2.fastq.gz     | reverse   |
| control4  | 9_R1.fastq.gz     | forward   |
| control4  | 9_R2.fastq.gz     | reverse   |
| control5  | 10_R1.fastq.gz    | forward   |
| control5  | 10_R2.fastq.gz    | reverse   |
| VPA1      | 21_R1.fastq.gz    | forward   |
| VPA1      | 21_R2.fastq.gz    | reverse   |
| VPA2      | 22_R1.fastq.gz    | forward   |
| VPA2      | 22_R2.fastq.gz    | reverse   |
| VPA3      | 23_R1.fastq.gz    | forward   |
| VPA3      | 23_R2.fastq.gz    | reverse   |
| VPA4      | 24_R1.fastq.gz    | forward   |
| VPA4      | 24_R2.fastq.gz    | reverse   |
| VPA5      | 25_R1.fastq.gz    | forward   |
| VPA5      | 25_R2.fastq.gz    | reverse   |
| CCFM10761 | 41_R1.fastq.gz    | forward   |
| CCFM10761 | 41_R2.fastq.gz    | reverse   |
| CCFM10762 | 42_R1.fastq.gz    | forward   |
| CCFM10762 | 42_R2.fastq.gz    | reverse   |
| CCFM10763 | 43_R1.fastq.gz    | forward   |
| CCFM10763 | 43_R2.fastq.gz    | reverse   |
| CCFM10764 | 44_R1.fastq.gz    | forward   |
| CCFM10764 | 44_R2.fastq.gz    | reverse   |
| CCFM10765 | 45_R1.fastq.gz    | forward   |
| CCFM10765 | 45_R2.fastq.gz    | reverse   |
| La281     | 46_R1.fastq.gz    | forward   |
| La281     | 46_R2.fastq.gz    | reverse   |
| La282     | 47_R1.fastq.gz    | forward   |
| La282     | 47_R2.fastq.gz    | reverse   |
| La283     | 48_R1.fastq.gz    | forward   |
| La283     | 48_R2.fastq.gz    | reverse   |
| La284     | 49_R1.fastq.gz    | forward   |
| La284     | 49_R2.fastq.gz    | reverse   |
| La285     | 50_R1.fastq.gz    | forward   |
| La285     | 50_R2.fastq.gz    | reverse   |
| JCM11321  | 50_R1.fastq.gz    | forward   |
| JCM11321  | 50_R2.fastq.gz    | reverse   |
| JCM11322  | 51_R1.fastq.gz    | forward   |
| JCM11322  | 51_R2.fastq.gz    | reverse   |
| JCM11323  | 52_R1.fastq.gz    | forward   |
| JCM11323  | 52_R2.fastq.gz    | reverse   |
| JCM11324  | 53_R1.fastq.gz    | forward   |
| JCM11324  | 53_R2.fastq.gz    | reverse   |
| JCM11325  | 54_R1.fastq.gz    | forward   |
| JCM11325  | 54_R2.fastq.gz    | reverse   |

|          |                |         |
|----------|----------------|---------|
| JCM11326 | 55_R1.fastq.gz | forward |
| JCM11326 | 55_R2.fastq.gz | reverse |
| MED1     | 36_R1.fastq.gz | forward |
| MED1     | 36_R2.fastq.gz | reverse |
| MED2     | 37_R1.fastq.gz | forward |
| MED2     | 37_R2.fastq.gz | reverse |
| MED3     | 38_R1.fastq.gz | forward |
| MED3     | 38_R2.fastq.gz | reverse |
| MED4     | 39_R1.fastq.gz | forward |
| MED4     | 39_R2.fastq.gz | reverse |
| MED5     | 40_R1.fastq.gz | forward |
| MED5     | 40_R2.fastq.gz | reverse |
