# Supplementary material for: Daily intake of Lactobacillus alleviates autistic-like behaviors by ameliorating the 5-hydroxytryptamine metabolic disorder in VPA-treated rats during weaning and sexual maturation
Source: Royal Society of Chemistry journal article supplement (doi:10.1039/d0fo02375b), 2021-01-01
Supplement: d0fo02375b5.xlsx [file d0fo02375b5.xlsx]

## Sheet: Sheet1
F/B
	VPA	CON	1076	La28	1132	MED
	4.22841	9.39363	4.0944	6.84903	4.15055	16.7822
	63.8889	6.12421	2.35838	3.52455	4.0992	3.83071
	4.68665	5.3719	2.11789	6.14864	10.6696	1.95573
	25.1424	3.20951	2.45782	5.17628	2.26833	7.54357
	1.18511	5.17863	3.67982	2.08189	6.39318	3.56529
					2.95813
g__Prevotellaceae UCG-001
	VPA	CON	1076	La28	1132	MED
	21	31	66	290	290	14
	0	37	259	275	275	91
	22	40	9	7	7	138
	0	29	218	344	344	39
	0`	16	77	95	95	89
					27
g__Helicobacter
	VPA	CON	1076	La28	1132	MED
	92	4	426	29	54	17
	0	6	27	363	6	48
	202	11	14	120	52	128
	0	6	395	759	25	22
	37	5	131	61	76	41
					34
g__Ruminococcus 2
	VPA	CON	1076	La28	1132	MED
	0	41	319	214	472	8
	29	166	433	20	254	23
	0	299	80	56	107	77
	28	0	1091	33	591	234
	77	20	176	25	469	64
					237
