# Supplementary figures and images for: Daily intake of Lactobacillus alleviates autistic-like behaviors by ameliorating the 5-hydroxytryptamine metabolic disorder in VPA-treated rats during weaning and sexual maturation
Source: Royal Society of Chemistry journal article supplement (doi:10.1039/d0fo02375b), 2021-01-01

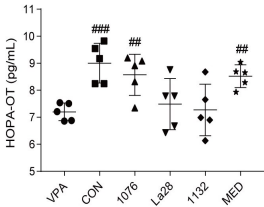

Supplement: d0fo02375b1.pdf [file d0fo02375b1.pdf]

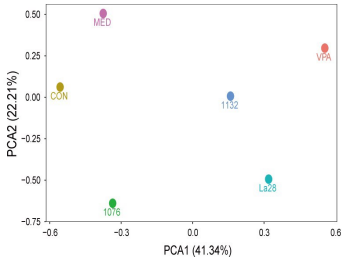

Supplement: d0fo02375b2.pdf [file d0fo02375b2.pdf]

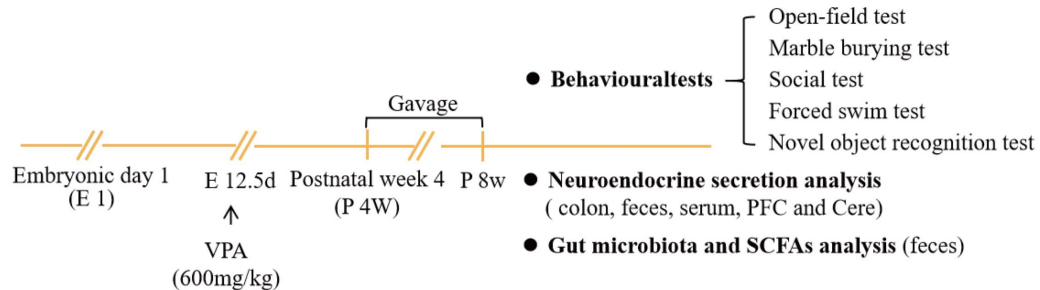

Supplement: d0fo02375b3.pdf [file d0fo02375b3.pdf]
